# Supplementary material
Source: MDPI journal article supplement (https://www.mdpi.com/2073-4344/12/12/1520)
Supplement: s1 [file s1 › catalysts-2034410-supplementary.pdf]

## Electronic Supplementary Information (ESI)

### Electronic tuning of sterically encumbered 2-(arylimino)pyridine-nickel ethylene polymerization catalysts by *para*-group modification

Zahra Hosseinzadeh,<sup>1</sup> Ming Liu,<sup>1</sup> Qiuyue Zhang,<sup>1</sup> Tongling Liang,<sup>1</sup> Gregory A. Solan,<sup>2,\*</sup> Yanping Ma,<sup>1</sup> and Wen-Hua Sun<sup>1,\*</sup>

<sup>1</sup> Key Laboratory of Engineering Plastics and Beijing National Laboratory for Molecular Sciences, Institute of Chemistry Chinese Academy of Sciences, Beijing 100190, China

<sup>2</sup>Department of Chemistry, University of Leicester, University Road, Leicester LE1 7RH, UK

Correspondence: gas8@leicester.ac.uk Tel.: +44-(0)116-252209 (G.A.S);  
whsun@iccas.ac.cn (W.-H. S.); Tel.: +86-10-6255-7955 (W.-H.S.)

#### Contents

#### Pages

Scheme S1 Synthetic route to **A1** – **A5**

Figure S1 GPC curves for the polyethylene produced using **Ni1**/MMAO at different Al:Ni molar ratios (runs 1 – 5, Table 4).

Figure S2 GPC curves for the polyethylene produced using **Ni1**/MMAO at different reaction temperatures (runs 2, 6 – 8, Table 4).

Figure S3 GPC curves for the polyethylene produced using **Ni1**/MMAO at different reaction times (runs 2, 9 – 12, Table 4).

Figure S4 GPC curves for the polyethylene produced using **Ni1-Ni5**/MMAO under optimized conditions (runs 2, 15 – 18, Table 4).

Figure S5 <sup>13</sup>C NMR spectrum of the polyethylene sample produced using **Ni1**/EtAlCl<sub>2</sub> at 20 °C (run 7, Table 3), including an inset of the alkenic region and a segment of the assigned polymer backbone; recorded at 100 °C in *d*-C<sub>2</sub>D<sub>2</sub>Cl<sub>4</sub>.

Figure S6  $^{13}\text{C}$  NMR spectrum of the polyethylene sample produced using **Ni1**/EtAlCl<sub>2</sub> at 50 °C (run 9, Table 3), including an inset of the alkenic region and a segment of the assigned polymer backbone; recorded at 100 °C in *d*-C<sub>2</sub>D<sub>2</sub>Cl<sub>4</sub>.

Figure S7  $^1\text{H}$  NMR spectrum of the polyethylene sample produced using **Ni1**/MMAO at 30 °C (run 2, Table 4); recorded at 100 °C in *d*-C<sub>2</sub>D<sub>2</sub>Cl<sub>4</sub>.

Figure S8  $^{13}\text{C}$  NMR spectrum of the polyethylene sample produced using **Ni1**/MMAO at 30 °C (run 2, Table 4), including an inset of the alkenic region and a segment of the assigned polymer backbone; recorded at 100 °C in *d*-C<sub>2</sub>D<sub>2</sub>Cl<sub>4</sub>.

Figure S9  $^{19}\text{F}$  NMR spectrum of **L1** (recorded in CDCl<sub>3</sub> at room temperature).

Figure S10  $^{19}\text{F}$  NMR spectrum of **L2** (recorded in CDCl<sub>3</sub> at room temperature).

Figure S11  $^{19}\text{F}$  NMR spectrum of **L3** (recorded in CDCl<sub>3</sub> at room temperature).

Figure S12  $^{19}\text{F}$  NMR spectrum of **L4** (recorded in CDCl<sub>3</sub> at room temperature).

Figure S13  $^{19}\text{F}$  NMR spectrum of **L5** (recorded in CDCl<sub>3</sub> at room temperature).

Figure S14  $^{19}\text{F}$  NMR spectrum of **Ni1** (recorded in CDCl<sub>3</sub> at room temperature).

Figure S15  $^{19}\text{F}$  NMR spectrum of **Ni2** (recorded in CDCl<sub>3</sub> at room temperature).

Figure S16  $^{19}\text{F}$  NMR spectrum of **Ni3** (recorded in CDCl<sub>3</sub> at room temperature).

Figure S17  $^{19}\text{F}$  NMR spectrum of **Ni4** (recorded in CDCl<sub>3</sub> at room temperature).

Figure S18  $^{19}\text{F}$  NMR spectrum of **Ni5** (recorded in CDCl<sub>3</sub> at room temperature).

Figure S19 DSC curve **Ni**/MMAO (recorded at room temperature).

13

Table S1 Crystal data and structure refinement for **Ni4'** and **Ni5**

**1. Synthesis and characterization of anilines, 2,6-(CH(C<sub>6</sub>H<sub>4</sub>-*p*-F)<sub>2</sub>)-4-RC<sub>6</sub>H<sub>2</sub>NH<sub>2</sub> (A1 – A5)**

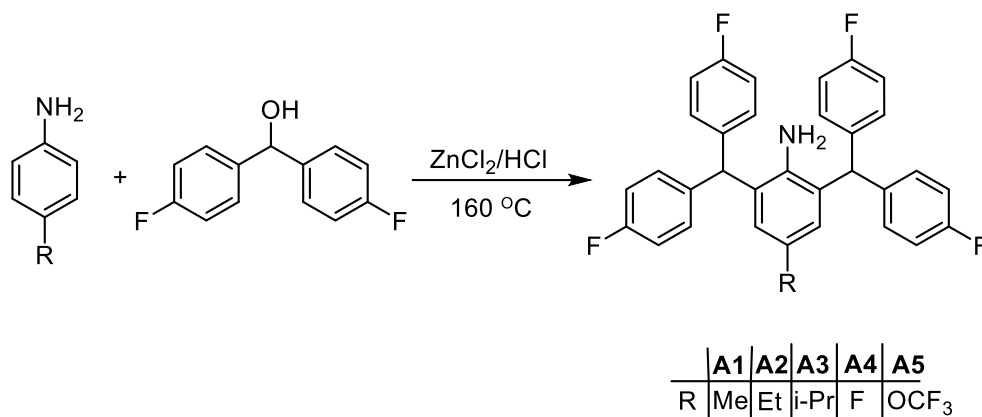

Scheme S1 Synthetic route to A1 – A5

(a) R = Me **A1**. Based on a Friedel-Crafts procedure,<sup>[1,2]</sup> a round bottom flask (500 mL) was loaded with bis(4-fluorophenyl)methanol (12.55 g, 57 mmol) and 4-methylaniline (3.06 g, 28.62 mmol). The mixture was stirred at 160 °C for 20 min to form a homogeneous solution and then a catalytic amount of ZnCl<sub>2</sub> (0.59 g, 15 mol%) in a 36-38% in HCl (3 mL) added dropwise. The reaction mixture was further stirred for 4 h. After cooling to room temperature, the resulting solid was dissolved in dichloromethane (250 mL) and the solution filtered. The filtrate was washed with a saturated aqueous solution of NH<sub>4</sub>Cl (55 mL) followed by a saturated solution of NaCl (2 x 55 mL). The organic layer was collected, dried over anhydrous Na<sub>2</sub>SO<sub>4</sub> and then concentrated under reduced pressure. The sticky residue was dissolved in a minimum amount dichloromethane and methanol (55 mL) added to induce precipitation. After filtration **A1** was afforded as a white solid (8.28 g, 55%). <sup>1</sup>H NMR (400 MHz, CDCl<sub>3</sub>, TMS): δ 6.93-7.01 (m, 16H), 6.30 (s, 2H), 5.37 (s, 2H), 3.32 (s, 2H), 2.00 (s, 3H).

(b) R = Et **A2**. By employing a similar method as outlined for the preparation of **A1**, **A2** was obtained as a white solid (5.60 g, 56%).  $^1\text{H}$  NMR (400 MHz,  $\text{CDCl}_3$ , TMS):  $\delta$  6.93-7.01 (m, 16H), 6.30 (s, 2H), 5.37 (s, 2H), 3.32 (s, 2H), 2.00 (s, 3H).

(c) R = i-Pr **A3**. By employing a similar method as outlined for the preparation of **A1**, **A3** was obtained as a white solid (6.25 g, 48%).  $^1\text{H}$  NMR (400 MHz,  $\text{CDCl}_3$ , TMS):  $\delta$  6.90-7.03 (m, 16H), 6.37 (s, 2H), 5.39 (s, 2H), 2.52-2.57 (m, 1H), 0.94 (d,  $J$  = 8.0 Hz, 6H).

(d) R = F **A4**. By employing a similar method as outlined for the preparation of **A1**, **A4** was obtained as a white solid (5.2 g, 55%).  $^1\text{H}$  NMR (400 MHz,  $\text{CDCl}_3$ , TMS):  $\delta$  6.72-7.04 (m, 16H), 6.38 (s, 1H), 6.28 (s, 1H), 5.39 (s, 1H), 5.07 (s, 1H), 3.20 (s, 2H).

(e) R =  $\text{OCF}_3$  **A5**. By employing a similar method as outlined for the preparation of **A1**, **A5** was obtained as a white solid (7.6 g, 53%).  $^1\text{H}$  NMR (400 MHz,  $\text{CDCl}_3$ , TMS):  $\delta$  7.21 (m, 16H), 6.64 (s, 2H), 5.60 (s, 2H), 3.65 (s, 2H).

## 2. GPC curves for the polyethylenes produced using Ni/MMAO

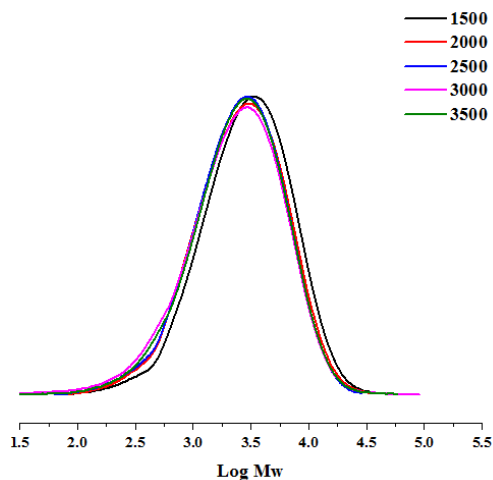

Figure S1 GPC curves for the polyethylene produced using **Ni1**/MMAO at different Al:Ni molar ratios (runs 1 – 5, Table 4).

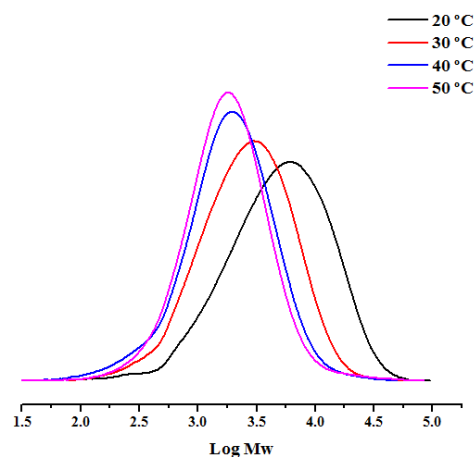

Figure S2 GPC curves for the polyethylene produced using **Ni1**/MMAO at different reaction temperatures (runs 2, 6 – 8, Table 4).

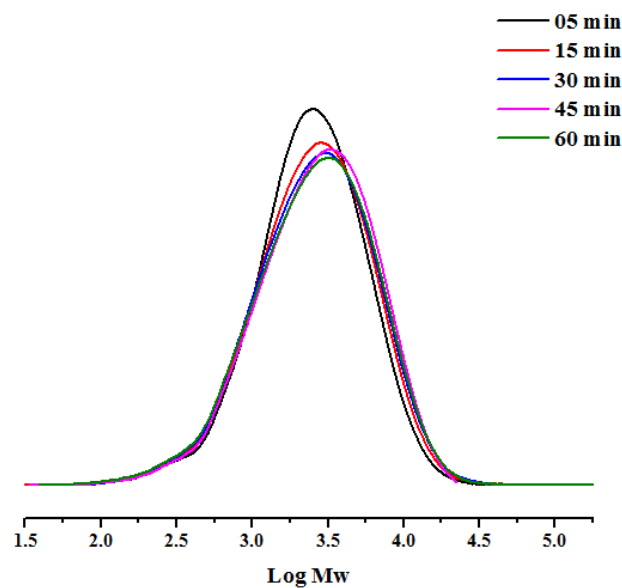

Figure S3 GPC curves for the polyethylene produced using **Ni1**/MMAO at different reaction times (runs 2, 9 – 12, Table 4).

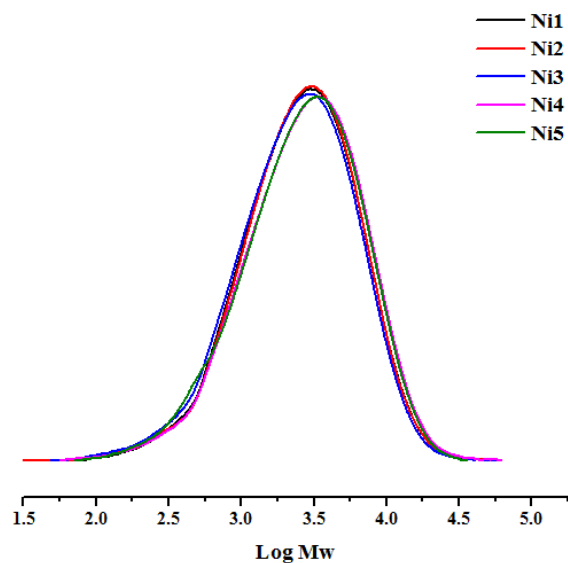

Figure S4 GPC curves for the polyethylene produced using **Ni1-Ni5**/MMAO under optimized conditions (runs 2, 15 – 18, Table 4).

### 3. $^{13}\text{C}$ NMR spectra of the polyethylene obtained using Ni1/EtAlCl<sub>2</sub> at 20 °C and 50 °C.

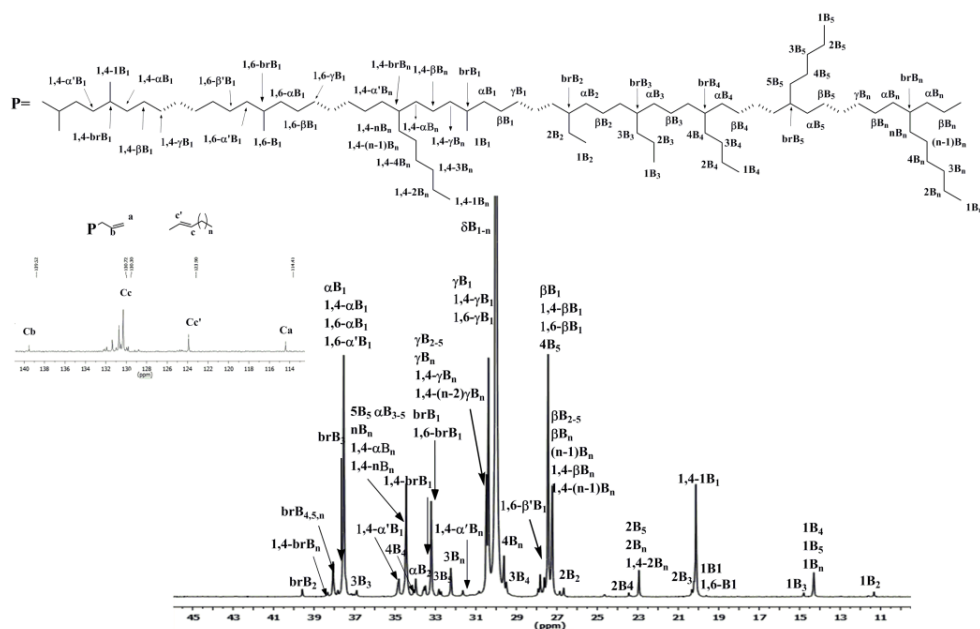

Figure S5  $^{13}\text{C}$  NMR spectrum of the polyethylene sample produced using Ni1/EtAlCl<sub>2</sub> at 20 °C (run7, Table 3), including an inset of the alkenic region and a segment of the assigned polymer backbone; recorded at 100 °C in *d*-C<sub>2</sub>D<sub>2</sub>Cl<sub>4</sub>.

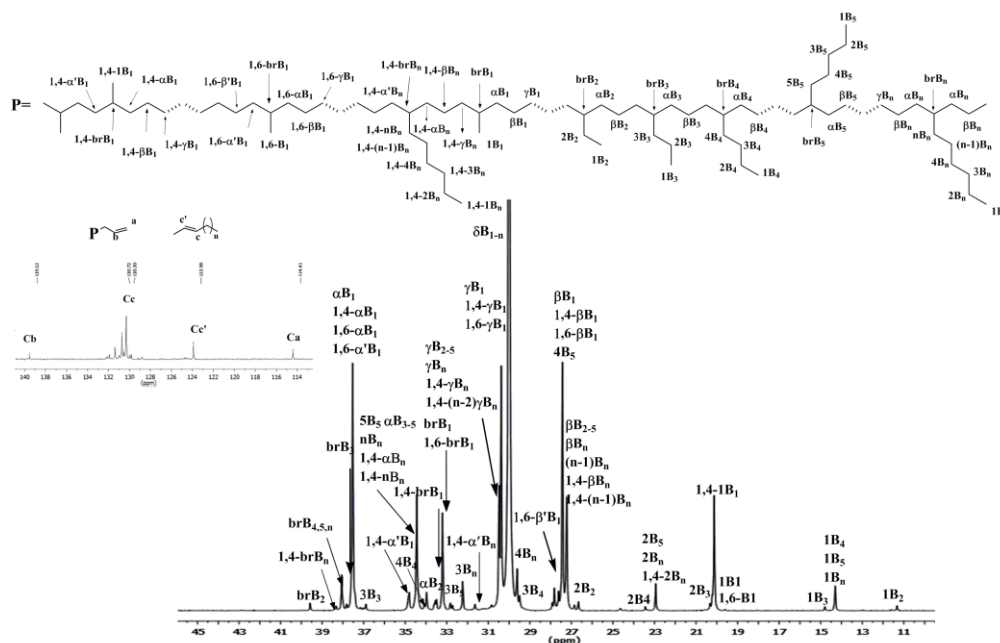

Figure S6  $^{13}\text{C}$  NMR spectrum of the polyethylene sample produced using Ni1/EtAlCl<sub>2</sub> at 50 °C (run9, Table 3), including an inset of the alkenic region and a segment of the assigned polymer backbone; recorded at 100 °C in *d*-C<sub>2</sub>D<sub>2</sub>Cl<sub>4</sub>.

4.  $^1\text{H}$  and  $^{13}\text{C}$  NMR spectra of the polyethylene obtained using Ni1/MMAO at 30 °C (run 6, Table 3).

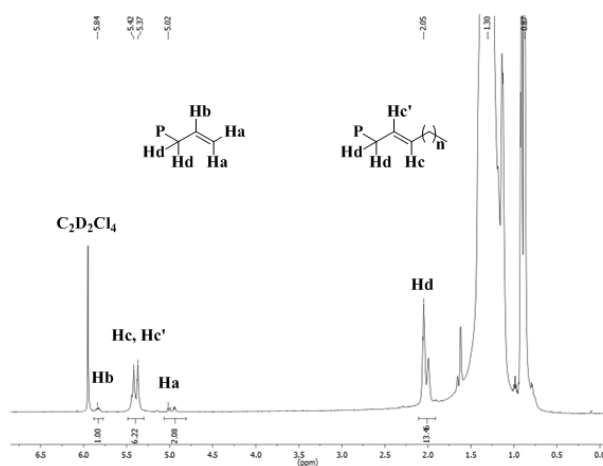

## 5. $^{19}\text{F}$ NMR spectra of L1 - L5 and Ni1 - Ni5

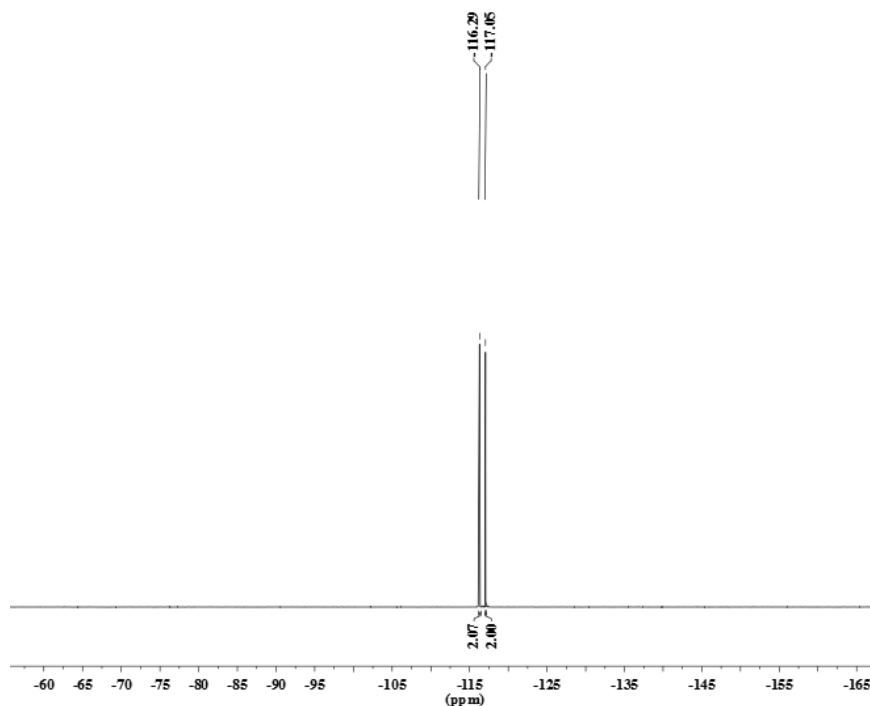

Figure S9  $^{19}\text{F}$  NMR spectrum of **L1** (recorded in  $\text{CDCl}_3$  at room temperature).

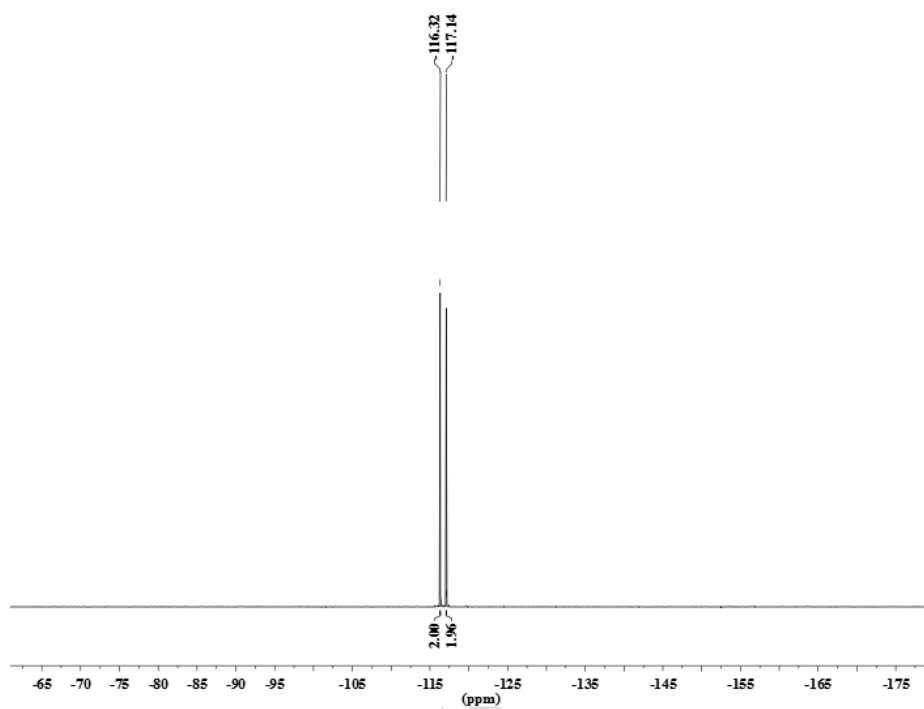

Figure S10  $^{19}\text{F}$  NMR spectrum of **L2** (recorded in  $\text{CDCl}_3$  at room temperature).

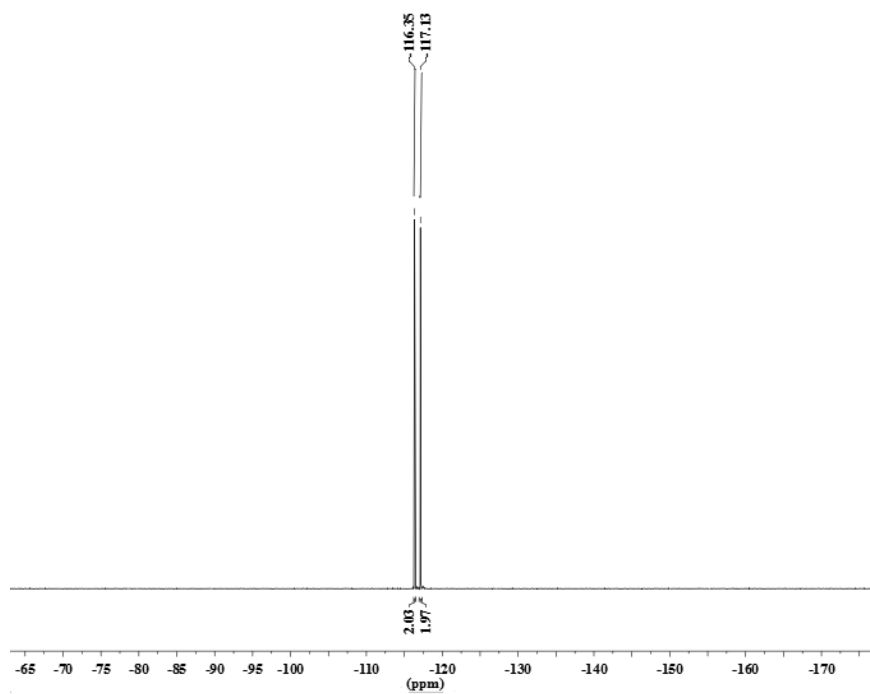

Figure S11  $^{19}\text{F}$  NMR spectrum of **L3** (recorded in  $\text{CDCl}_3$  at room temperature).

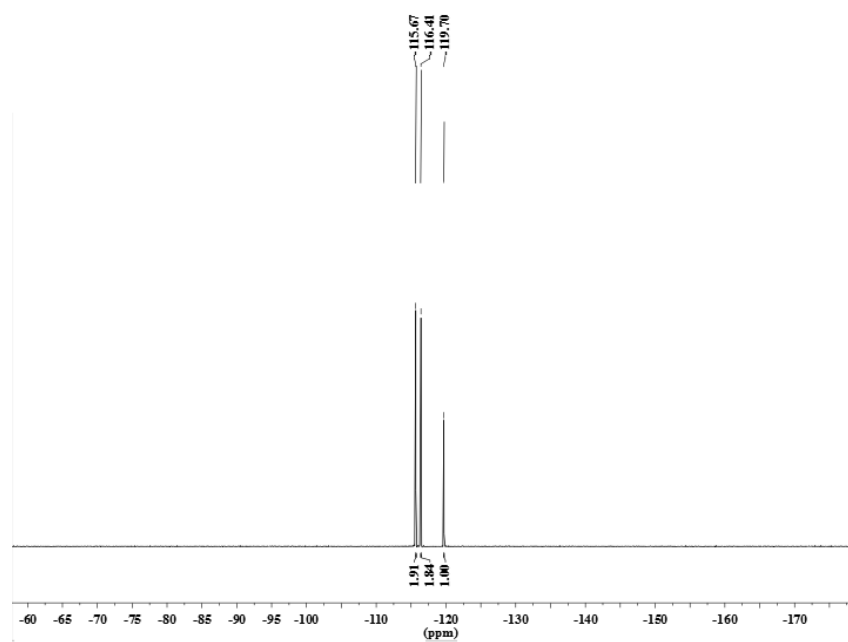

Figure S12  $^{19}\text{F}$  NMR spectrum of **L4** (recorded in  $\text{CDCl}_3$  at room temperature).

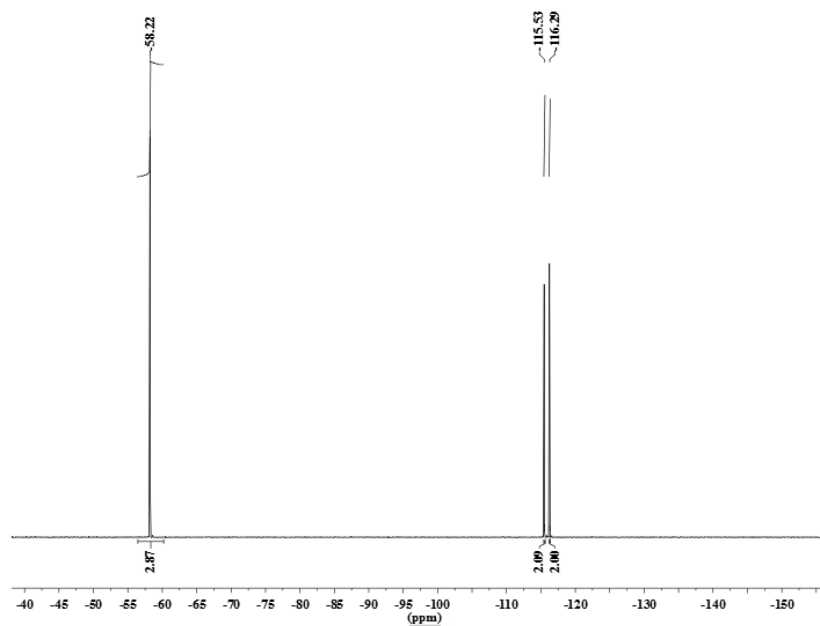

Figure S13  $^{19}\text{F}$  NMR spectrum of **L5** (recorded in  $\text{CDCl}_3$  at room temperature).

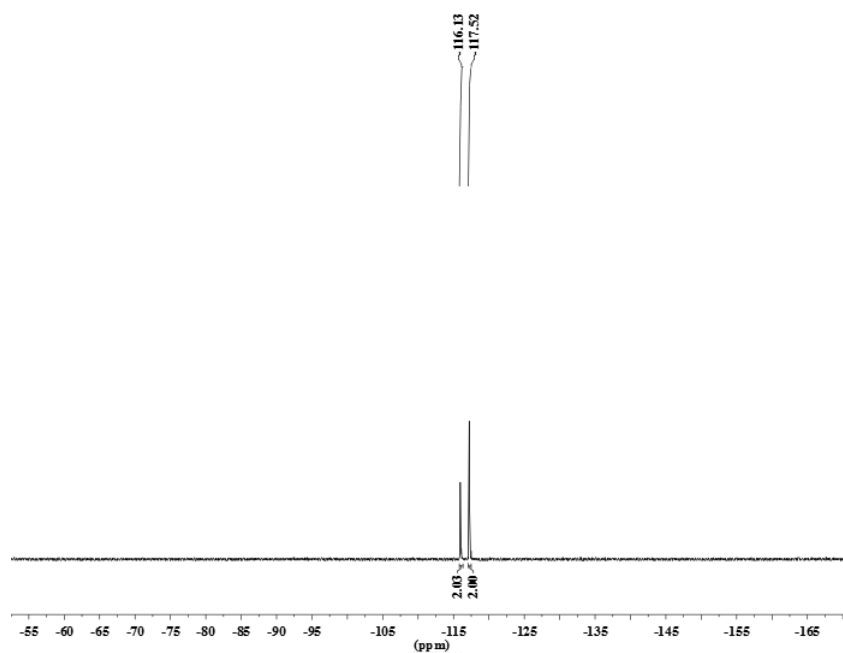

Figure S14  $^{19}\text{F}$  NMR spectrum of **Ni1** (recorded in  $\text{CDCl}_3$  at room temperature).

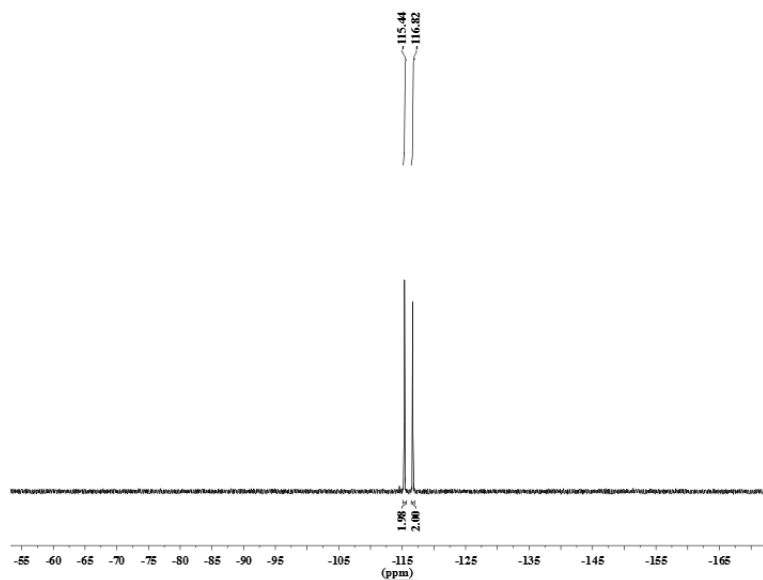

Figure S15  $^{19}\text{F}$  NMR spectrum of Ni2 (recorded in  $\text{CDCl}_3$  at room temperature).

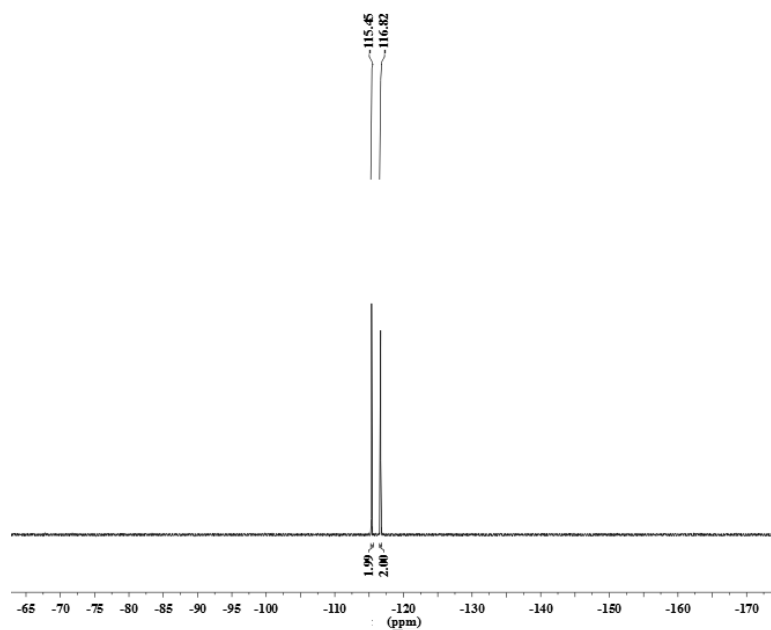

Figure S16  $^{19}\text{F}$  NMR spectrum of Ni3 (recorded in  $\text{CDCl}_3$  at room temperature).

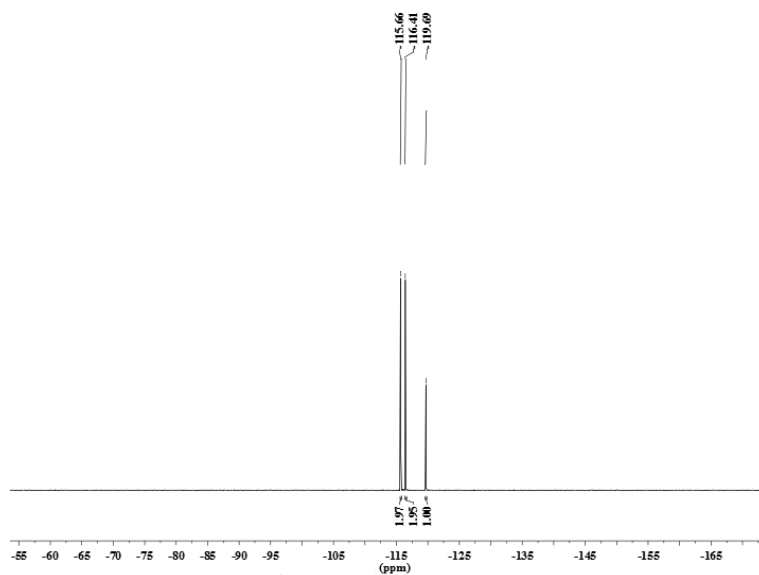

Figure S17  $^{19}\text{F}$  NMR spectrum of **Ni4** (recorded in  $\text{CDCl}_3$  at room temperature).

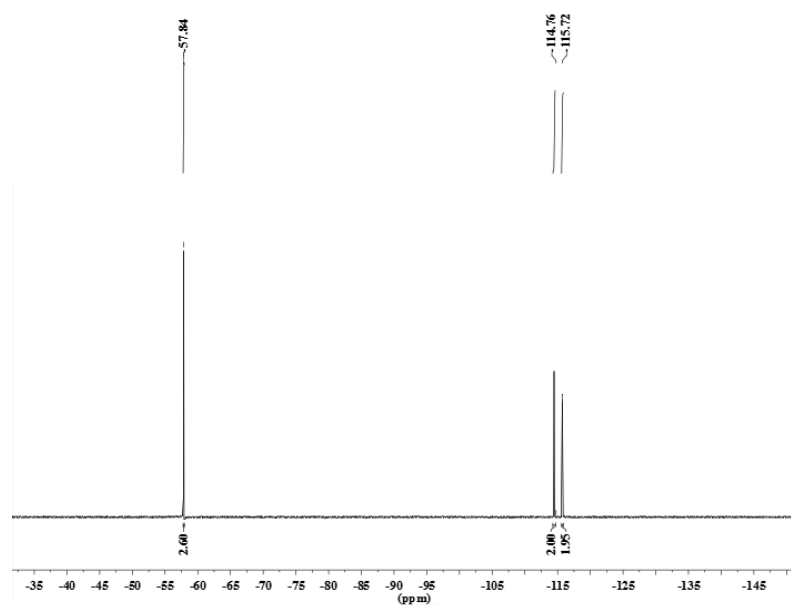

Figure S18  $^{19}\text{F}$  NMR spectrum of **Ni5** (recorded in  $\text{CDCl}_3$  at room temperature).

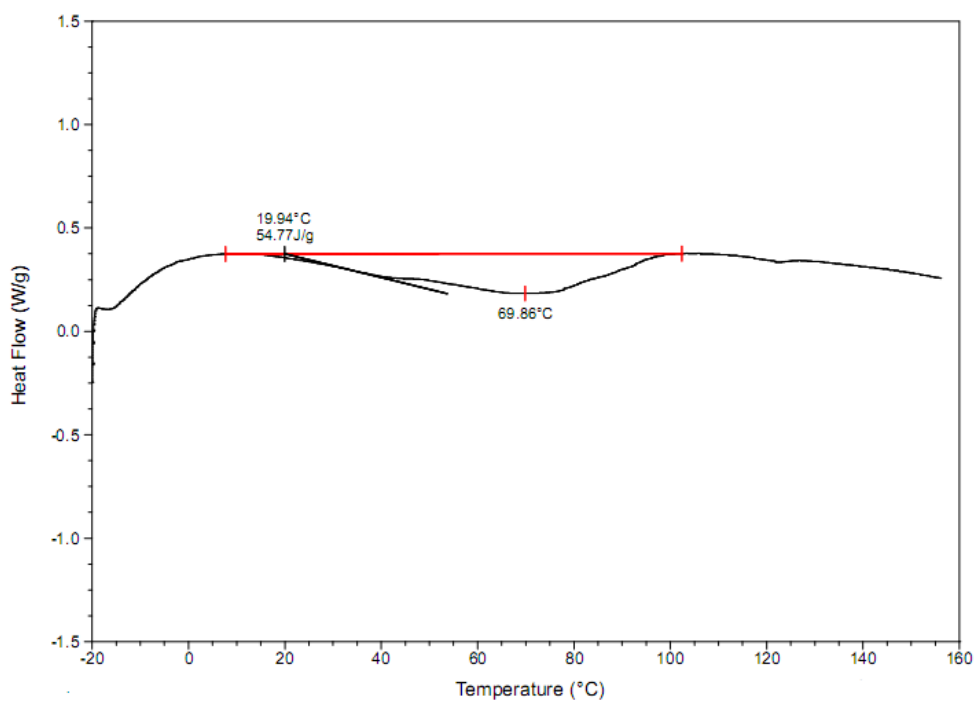

Figure S19 DSC curve **Ni/MMAO** (recorded at room temperature).

Table S1 Crystal data and structure refinement for **Ni4'** and **Ni5**

|                                             | <b>Ni4'</b>                                                       | <b>Ni5</b>                                                        |
|---------------------------------------------|-------------------------------------------------------------------|-------------------------------------------------------------------|
| Identification code                         | 2215182                                                           | 2215183                                                           |
| Empirical formula                           | BrC <sub>39</sub> F <sub>5</sub> N <sub>2</sub> Ni <sub>0.5</sub> | Br <sub>2</sub> C <sub>40</sub> F <sub>7</sub> N <sub>2</sub> NiO |
| Formula weight                              | 700.68                                                            | 875.95                                                            |
| Temperature/K                               | 169.98(11)                                                        | 169.99(11)                                                        |
| Crystal system                              | triclinic                                                         | triclinic                                                         |
| Space group                                 | P-1                                                               | P-1                                                               |
| a/Å                                         | 11.1117(4)                                                        | 10.2966(4)                                                        |
| b/Å                                         | 13.3208(4)                                                        | 10.7584(4)                                                        |
| c/Å                                         | 13.5631(4)                                                        | 16.8828(5)                                                        |
| $\alpha$ /°                                 | 113.925(3)                                                        | 103.165(3)                                                        |
| $\beta$ /°                                  | 90.490(3)                                                         | 100.812(3)                                                        |
| $\gamma$ /°                                 | 106.159(3)                                                        | 96.110(3)                                                         |
| Volume/Å <sup>3</sup>                       | 1745.64(11)                                                       | 1766.82(11)                                                       |
| Z                                           | 2                                                                 | 2                                                                 |
| $\rho_{\text{calc}}/\text{cm}^3$            | 1.333                                                             | 1.647                                                             |
| $\mu/\text{mm}^{-1}$                        | 2.351                                                             | 4.086                                                             |
| F(000)                                      | 684.0                                                             | 846.0                                                             |
| Crystal size/mm <sup>3</sup>                | 0.35 × 0.2 × 0.05                                                 | 0.15 × 0.05 × 0.02                                                |
| Radiation                                   | Cu K $\alpha$ ( $\lambda$ = 1.54184)                              | Cu K $\alpha$ ( $\lambda$ = 1.54184)                              |
| 2 $\Theta$ range for data collection/°      | 7.2 to 151.232                                                    | 5.51 to 150.7                                                     |
| Index ranges                                | -13 ≤ h ≤ 13, -16 ≤ k ≤ 16, -16 ≤ l ≤ 16                          | -12 ≤ h ≤ 12, -13 ≤ k ≤ 13, -20 ≤ l ≤ 19                          |
| Reflections collected                       | 22774                                                             | 21981                                                             |
| Independent reflections                     | 6900 [R <sub>int</sub> = 0.0553, R <sub>sigma</sub> = 0.0517]     | 6956 [R <sub>int</sub> = 0.0631, R <sub>sigma</sub> = 0.0587]     |
| Data/restraints/parameters                  | 6900/0/430                                                        | 6956/0/478                                                        |
| Goodness-of-fit on F <sup>2</sup>           | 1.037                                                             | 1.044                                                             |
| Final R indexes [I ≥ 2 $\sigma$ (I)]        | R <sub>1</sub> = 0.0785, wR <sub>2</sub> = 0.2231                 | R <sub>1</sub> = 0.0596, wR <sub>2</sub> = 0.1704                 |
| Final R indexes [all data]                  | R <sub>1</sub> = 0.0886, wR <sub>2</sub> = 0.2342                 | R <sub>1</sub> = 0.0673, wR <sub>2</sub> = 0.1791                 |
| Largest diff. peak/hole / e Å <sup>-3</sup> | 1.52/-1.31                                                        | 1.52/-1.15                                                        |

## 6. References

- 1 Meiries, S.; Speck, K.; Cordes, D. B.; Slawin, A. M. Z.; Nolan, S. P. S. Meiries, K. Speck, D. B. Cordes, A. M. Z. Slawin and S. P., Nolan, [Pd(IPr<sup>\*OMe</sup>)(acac)Cl]: Tuning the N-Heterocyclic Carbene in Catalytic C–N Bond Formation. *Organometallics*, **2012**, 32, 330-339.
- 2 Zada, M.; Guo, L.; Zhang, R.; Zhang, W.; Ma, Y.; Solan, G. A.; Sun, Y.; Sun, W.-H. Moderately branched ultra-high molecular weight polyethylene by using N,N'-nickel catalysts adorned with sterically hindered dibenzocycloheptyl groups. *Appl. Organomet. Chem.* **2019**, 33, e4749.
